# Supplementary material for: Overexpression of a Pathogenesis-Related Protein 10 Enhances Biotic and Abiotic Stress Tolerance in Rice
Source: PubMed Central journal article supplement — Plant Pathol J. 2016 Dec 1;32(6):552–62. doi: 10.5423/PPJ.OA.06.2016.0141 (PMC5117864; doi:10.5423/ppj.oa.06.2016.0141), 2016-12-01
Supplement: ppj-32-552-suppl.pdf [file ppj-32-552-suppl.pdf]

### Supplementary Table S1. Primers used in this study.

| Primer Name         | Forward (5' to 3')               | Reverse (5' to 3')               | Usage                       |
|---------------------|----------------------------------|----------------------------------|-----------------------------|
| JIOsPR10            | ATGGCATCCACCAACAGCTGG            | GTTGTAAGCGTCCGGTTGGC             | Gene cloning                |
| JIOsPR10 Gateway    | AAAAAGCAGGCTTCATGGCATCCACCAACAGC | AGAAAGCTGGGTCCGTTGTAAGCGTCCGGGTT | Gateway vector construction |
| Gateway attB primer | GGGACAAGTTTGTACAAAAAGCAGGCT      | GGGACCACCTTGTACAAGAAAGCTGGGT     | Gateway Vector construct    |
| JIOsPR10 Genotyping | CGGACCAAGAATGCTAA                | GGTCTCCTTCGGTGTCTG               | Genotyping                  |
| OsActin1            | AGGAATGGAAGCTGCGGGTAT            | GCAGGAGGACGGCGATAACA             | RT-PCR                      |
| JIOsPR10 RT         | ACAGCTGGACCCACGAGAT              | GGAGGAGCTTGTACGTGGAC             | RT-PCR                      |
